# Supplementary material for: Topographic depressions provide potential microrefugia for ground-dwelling arthropods
Source: Oxford University Press journal article supplement (doi:10.1525/elementa.2021.00084), 2022-01-01
Supplement: supplementalexceltables1.xlsx [file supplementalexceltables1.xlsx]

## Sheet: Spiders
2019	1	2	3	4	5	6	7	8	9	10	11	12	13	14	15	16	17	18	19	20	21	22	23	24	25	26	27	28	29	30	31	32	33	34	35	36	37	38	39	40	41	42	43	44	45	46	47	48	49
Spiders (Araneae)
Number of dolines (and plateau sites)	1	1	1	1	1	2	2	2	2	2	3	3	3	3	3	4	4	4	4	4	5	5	5	5	5	6	6	6	6	6	7	7	7	7	7	8	8	8	8	8	9	9	9	9	9	10	10	10	10
Habitats: P = Plateau; D = Doline	P	P	P	P	P	P	P	P	P	P	P	P	P	P	P	P	P	P	P	P	P	P	P	P	P	P	P	P	P	P	P	P	P	P	P	P	P	P	P	P	P	P	P	P	P	P	P	P	P
Number of samples	1	2	3	4	5	1	2	3	4	5	1	2	3	4	5	1	2	3	4	5	1	2	3	4	5	1	2	3	4	5	1	2	3	4	5	1	2	3	4	5	1	2	3	4	5	1	2	3	4
Agroeca brunnea	-	-	0	0	0	0	0	0	0	0	0	1	0	0	0	-	0	0	0	0	-	0	0	0	0	0	0	0	0	0	0	0	0	0	0	1	0	-	-	-	0	0	0	0	-	0	0	0	0
Agyneta affinis	-	-	0	0	0	0	0	0	0	0	0	0	0	0	0	-	0	0	0	0	-	0	0	0	0	0	0	0	0	0	0	0	0	0	0	0	0	-	-	-	0	0	0	0	-	0	0	0	0
Agyneta rurestris	-	-	0	0	0	0	0	0	0	0	0	0	0	0	0	-	0	0	0	0	-	0	0	0	0	0	0	0	0	0	0	0	0	0	0	0	0	-	-	-	0	0	0	0	-	0	0	0	0
Amaurobius jugorum	-	-	0	0	0	0	0	0	0	0	0	1	0	0	0	-	0	0	0	0	-	0	0	0	0	0	0	0	0	0	0	0	0	0	0	0	0	-	-	-	0	0	0	1	-	0	0	0	0
Antistea elegans	-	-	0	0	0	0	0	0	0	0	0	0	0	0	0	-	0	0	0	0	-	0	0	0	0	0	0	0	0	0	0	0	0	0	0	0	0	-	-	-	0	0	0	0	-	0	0	0	0
Anyphaena accentuata	-	-	0	0	0	0	0	0	0	0	0	0	0	0	0	-	0	0	0	0	-	0	0	0	0	0	0	0	0	0	0	0	0	0	0	1	0	-	-	-	0	0	0	0	-	0	0	0	0
Apostenus fuscus	-	-	0	0	0	1	1	0	0	0	0	1	0	0	0	-	0	0	0	0	-	1	1	1	0	0	0	0	0	0	0	2	1	3	0	0	0	-	-	-	0	0	0	0	-	0	1	1	2
Atypus affinis	-	-	0	0	0	0	0	0	0	0	1	0	0	0	0	-	0	0	0	0	-	0	0	0	0	0	0	0	0	0	0	0	0	0	0	0	0	-	-	-	0	0	0	0	-	0	0	0	0
Atypus muralis	-	-	0	0	0	0	0	0	0	0	0	0	0	0	0	-	0	0	0	0	-	0	0	0	0	0	0	0	0	0	0	0	0	0	0	0	0	-	-	-	0	0	0	0	-	0	0	0	0
Atypus piceus	-	-	0	0	0	0	0	0	0	0	0	0	0	0	0	-	0	0	0	0	-	0	0	0	0	0	0	0	0	0	0	0	0	0	0	0	0	-	-	-	0	0	0	0	-	0	0	0	0
Carrhotus xanthogramma	-	-	0	0	0	0	0	0	0	0	0	0	0	0	0	-	0	0	0	0	-	0	0	0	0	0	0	0	0	0	0	0	0	0	0	0	0	-	-	-	0	0	0	0	-	0	0	0	0
Centromerus sylvaticus	-	-	0	0	0	0	0	0	0	0	0	0	0	0	0	-	0	0	0	0	-	0	0	0	0	0	0	0	0	0	0	0	0	0	0	0	0	-	-	-	0	0	0	0	-	0	0	0	0
Ceratinella brevis	-	-	0	0	0	0	0	0	0	0	0	0	0	0	0	-	0	0	0	0	-	0	0	0	0	0	0	0	0	0	0	0	0	0	0	0	0	-	-	-	0	0	0	0	-	0	0	0	0
Clubiona pallidula	-	-	0	0	0	0	0	0	0	0	0	0	0	0	0	-	0	0	0	0	-	0	0	0	0	0	0	0	0	0	0	0	0	0	0	0	0	-	-	-	0	0	0	0	-	0	0	0	0
Clubiona terrestris	-	-	0	0	0	0	0	0	0	1	0	0	0	0	0	-	0	0	0	0	-	0	0	0	0	0	0	0	0	0	0	0	0	0	0	0	0	-	-	-	0	0	0	0	-	0	0	0	0
Crustulina guttata	-	-	0	0	0	0	0	0	0	0	0	0	0	0	0	-	0	0	0	0	-	0	0	0	0	0	0	0	0	0	0	0	0	0	0	0	0	-	-	-	0	0	0	0	-	0	0	0	0
Dasumia canestrinii	-	-	0	0	0	0	0	0	0	0	0	0	0	0	0	-	0	0	0	0	-	0	0	0	0	0	0	0	0	0	0	0	0	0	0	0	0	-	-	-	0	0	0	0	-	3	0	2	0
Diplocephalus alpinus	-	-	0	0	0	0	0	0	0	0	0	0	0	0	0	-	0	0	0	0	-	0	0	0	0	0	0	0	0	0	0	0	0	0	0	0	0	-	-	-	0	0	0	0	-	0	0	0	0
Diplocephalus cristatus	-	-	0	0	0	0	0	0	0	0	0	0	0	0	0	-	0	0	0	0	-	0	0	0	0	0	0	0	0	0	0	0	0	0	0	0	0	-	-	-	0	0	0	0	-	0	0	0	0
Diplostyla concolor	-	-	1	0	0	1	0	0	0	0	0	0	0	0	0	-	0	0	0	0	-	0	1	0	0	0	0	0	1	0	1	0	0	4	0	0	0	-	-	-	1	0	1	0	-	0	0	0	0
Drassyllus villicus	-	-	0	0	0	1	0	0	0	0	2	5	0	2	3	-	5	1	0	1	-	0	0	0	0	0	0	2	0	0	1	0	0	0	0	0	0	-	-	-	0	1	0	0	-	0	0	1	0
Dysdera longirostris	-	-	0	0	1	0	0	0	0	0	0	2	0	0	0	-	0	0	0	0	-	0	0	0	0	1	0	0	0	0	0	0	0	0	0	0	0	-	-	-	0	0	0	0	-	0	0	0	0
Dysdera ninnii	-	-	0	0	0	0	0	0	0	0	0	0	0	0	0	-	0	0	0	0	-	0	1	0	0	0	0	0	0	0	0	0	0	0	0	0	0	-	-	-	0	0	0	0	-	0	0	0	0
Enoplognatha thoracica	-	-	0	0	0	0	0	0	0	0	0	0	0	0	0	-	1	0	0	1	-	0	0	0	0	0	0	0	0	0	0	0	0	0	0	0	0	-	-	-	0	0	0	0	-	0	0	0	0
Euophrys frontalis	-	-	0	0	0	0	0	0	0	0	0	0	0	0	0	-	0	1	0	0	-	0	0	0	0	0	0	0	0	0	0	0	0	0	0	0	0	-	-	-	0	0	0	0	-	0	0	0	0
Euryopis flavomaculata	-	-	0	0	0	0	0	0	0	0	0	0	0	0	0	-	0	0	1	0	-	0	0	0	0	0	0	0	0	0	0	0	0	0	0	0	0	-	-	-	0	0	0	0	-	0	0	0	0
Haplodrassus silvestris	-	-	1	0	0	0	0	0	0	0	1	1	0	0	0	-	0	2	0	0	-	0	0	0	0	0	0	0	0	0	0	0	0	0	0	1	0	-	-	-	0	0	0	0	-	0	0	0	0
Harpactea hombergi	-	-	0	0	0	0	0	0	0	0	0	0	0	0	0	-	0	0	0	0	-	0	0	0	0	0	0	0	0	0	0	0	0	0	0	0	0	-	-	-	0	0	0	0	-	0	0	0	0
Harpactea saeva	-	-	0	0	1	0	0	0	0	0	0	0	0	0	0	-	0	2	0	1	-	0	0	0	0	2	1	1	1	1	0	1	0	0	0	1	0	-	-	-	3	0	1	1	-	0	4	0	1
Linyphia hortensis	-	-	0	0	0	0	0	0	0	0	0	0	0	0	0	-	0	0	0	0	-	0	0	0	0	0	0	0	0	0	0	1	0	0	0	0	0	-	-	-	0	0	0	0	-	0	0	0	0
Liocranoeca striata	-	-	0	0	0	0	0	0	0	0	0	0	0	0	0	-	0	0	0	0	-	0	0	0	0	0	0	0	0	0	0	0	0	0	0	0	0	-	-	-	0	0	0	0	-	0	0	0	0
Megalepthyphantes collinus	-	-	0	0	0	0	0	0	0	0	0	0	0	0	0	-	0	0	0	0	-	0	0	0	0	0	0	0	0	0	0	0	0	0	0	0	0	-	-	-	0	0	0	0	-	0	0	0	0
Micrargus herbigradus	-	-	0	0	0	0	0	0	0	0	0	0	0	0	0	-	0	1	0	0	-	0	0	0	0	0	0	0	0	0	0	0	0	0	0	0	0	-	-	-	0	0	0	0	-	0	0	0	0
Microdipoena jobi	-	-	0	0	0	0	0	0	0	0	0	0	0	0	0	-	0	0	0	0	-	0	0	0	0	0	0	0	0	0	0	0	0	0	0	0	0	-	-	-	0	0	0	0	-	0	0	0	0
Microneta viaria	-	-	0	0	0	0	0	0	0	1	0	0	1	0	0	-	0	0	0	0	-	0	0	0	0	0	0	0	0	0	0	0	1	0	0	1	0	-	-	-	0	0	0	0	-	0	0	1	0
Neon reticulatus	-	-	0	0	0	0	0	0	0	0	0	0	0	0	0	-	0	0	0	0	-	0	0	0	0	0	0	0	0	0	0	0	0	0	0	0	0	-	-	-	0	0	0	0	-	0	0	0	0
Neriene clathrata	-	-	0	0	0	0	0	0	0	0	0	1	0	0	0	-	0	0	0	0	-	0	0	0	0	0	0	0	0	0	0	0	0	0	0	0	0	-	-	-	0	0	0	0	-	0	0	0	0
Neriene radiata	-	-	0	0	0	0	0	0	0	0	0	0	0	0	0	-	0	0	0	0	-	0	0	0	0	0	0	0	0	0	0	0	0	0	0	0	0	-	-	-	0	1	0	0	-	0	0	0	0
Palliduphantes alutacius	-	-	0	0	0	0	0	0	0	0	0	0	0	0	0	-	0	0	0	0	-	0	0	0	0	0	0	0	1	0	0	0	0	0	0	0	0	-	-	-	0	0	0	0	-	0	0	0	0
Panamomops affinis	-	-	0	0	0	0	0	0	0	0	0	0	0	0	0	-	0	0	0	0	-	0	0	0	0	0	0	0	0	0	0	0	0	0	0	0	0	-	-	-	1	0	0	0	-	0	0	0	0
Panamomops mengei	-	-	0	0	0	0	0	0	0	0	0	0	0	0	0	-	0	0	0	0	-	0	0	0	0	0	0	0	0	0	0	0	0	0	0	0	0	-	-	-	0	0	0	0	-	0	0	0	0
Pardosa alacris	-	-	1	0	0	1	3	0	0	0	2	4	9	1	3	-	2	6	1	0	-	0	0	0	0	0	1	1	0	0	0	0	0	0	0	0	0	-	-	-	0	0	0	0	-	0	0	0	0
Phrurolithus festivus	-	-	0	0	0	0	0	0	0	0	0	0	0	0	0	-	0	0	0	0	-	0	0	0	0	0	0	0	0	0	0	0	0	0	0	0	0	-	-	-	0	0	0	0	-	0	0	0	0
Piratula hygrophila	-	-	0	0	0	0	0	0	0	0	0	0	0	0	0	-	0	0	0	0	-	0	0	0	0	0	0	0	0	0	0	0	0	0	0	0	0	-	-	-	0	0	0	0	-	0	0	0	0
Piratula uliginosa	-	-	0	0	0	0	0	0	0	0	0	0	0	0	0	-	0	0	0	0	-	0	0	0	0	0	0	0	0	0	0	0	0	0	0	0	0	-	-	-	0	0	0	0	-	0	0	0	0
Porrhomma microphthalmum	-	-	0	0	0	0	0	0	0	0	0	0	0	0	0	-	0	0	0	0	-	0	0	0	0	0	0	0	0	0	0	0	0	0	0	0	0	-	-	-	0	0	0	0	-	0	0	0	0
Porrhomma microps	-	-	0	0	0	0	0	0	0	0	0	0	0	0	0	-	0	0	0	0	-	0	0	0	0	0	0	0	0	0	0	0	0	0	0	0	0	-	-	-	0	0	0	0	-	0	0	0	0
Robertus arundineti	-	-	0	0	0	0	0	0	0	0	0	0	0	0	0	-	0	0	0	0	-	0	0	0	0	0	0	0	0	0	0	0	0	0	0	0	0	-	-	-	0	0	0	0	-	0	0	0	0
Robertus lividus	-	-	0	0	0	0	0	0	0	0	0	0	0	0	0	-	0	0	0	0	-	0	0	0	0	0	0	0	0	0	0	0	0	0	0	0	0	-	-	-	0	0	0	0	-	0	0	0	0
Saloca diceros	-	-	0	0	0	0	0	0	0	0	0	0	0	0	0	-	0	0	0	0	-	0	0	0	0	0	0	0	0	0	0	0	0	0	0	0	0	-	-	-	0	0	0	0	-	0	0	0	0
Scotina celans	-	-	0	0	0	0	0	0	0	0	0	0	0	0	0	-	0	0	0	0	-	0	0	0	0	0	0	0	0	0	0	0	0	0	0	1	0	-	-	-	0	0	0	0	-	0	0	0	0
Syedra apetlonensis	-	-	0	0	0	0	0	0	0	0	1	0	0	0	0	-	0	0	0	0	-	0	0	0	0	0	0	0	0	0	0	0	0	0	0	0	0	-	-	-	0	0	0	0	-	0	0	0	0
Tegenaria silvestris	-	-	0	0	0	0	0	0	0	0	0	0	0	0	0	-	0	0	0	0	-	0	0	0	0	0	0	0	0	0	0	0	0	0	0	0	0	-	-	-	0	0	0	1	-	0	0	0	0
Tenuiphantes flavipes	-	-	0	0	1	0	0	0	0	0	0	0	0	0	0	-	0	0	0	0	-	0	0	0	0	0	0	0	0	0	0	1	0	0	0	0	0	-	-	-	0	0	0	0	-	0	0	0	0
Tenuiphantes tenebricola	-	-	0	0	0	0	0	0	0	0	0	0	0	0	0	-	0	0	0	0	-	0	0	0	0	0	0	0	0	0	0	0	0	0	0	0	0	-	-	-	0	0	0	0	-	0	0	0	0
Tenuiphantes tenuis	-	-	0	0	0	0	0	0	0	0	0	0	0	0	0	-	0	0	0	0	-	0	0	0	0	0	0	0	0	0	0	0	0	0	0	0	0	-	-	-	0	0	0	0	-	0	0	0	0
Trachyzelotes pedestris	-	-	0	0	0	0	0	0	0	0	1	1	0	1	0	-	0	0	1	0	-	0	0	0	0	0	0	1	0	0	0	0	0	0	0	0	0	-	-	-	0	0	0	0	-	0	0	0	0
Trichoncus affinis	-	-	0	0	0	0	0	0	0	0	0	0	1	0	0	-	0	0	0	0	-	0	0	0	0	0	0	0	0	0	0	0	0	0	0	0	0	-	-	-	0	0	0	0	-	0	0	0	0
Trochosa robusta	-	-	0	0	0	0	0	0	0	0	0	0	0	0	0	-	0	0	0	0	-	0	0	0	0	0	0	0	0	0	0	0	0	0	0	0	0	-	-	-	0	0	0	0	-	0	0	0	0
Trochosa terricola	-	-	0	0	0	0	0	0	0	0	0	0	0	0	0	-	1	0	0	1	-	0	0	0	0	0	0	0	0	0	0	0	0	0	0	0	0	-	-	-	0	0	0	0	-	0	0	0	0
Urocoras longispina	-	-	0	0	0	0	0	0	0	0	0	0	0	0	0	-	1	0	0	0	-	0	0	0	0	0	0	0	0	0	0	0	0	0	0	0	0	-	-	-	0	0	0	0	-	0	0	0	0
Walckenaeria alticeps	-	-	0	0	0	0	0	0	0	0	0	0	0	0	0	-	0	0	0	0	-	0	0	0	0	0	0	0	0	0	0	0	0	0	0	0	0	-	-	-	0	0	0	0	-	0	0	0	0
Walckenaeria atrotibialis	-	-	0	0	0	0	0	0	0	0	0	0	0	0	0	-	0	0	0	0	-	0	0	0	0	0	0	0	0	0	0	0	0	0	0	1	0	-	-	-	0	0	0	0	-	0	0	0	0
Walckenaeria cucullata	-	-	0	0	0	0	0	0	0	0	0	0	0	0	0	-	0	0	0	0	-	0	0	0	0	0	0	0	0	0	0	0	0	0	0	0	0	-	-	-	0	0	0	0	-	0	0	0	0
Walckenaeria mitrata	-	-	0	0	0	0	0	0	0	0	0	0	0	0	0	-	0	0	0	0	-	0	0	0	0	0	0	0	0	0	0	0	0	0	0	0	0	-	-	-	0	0	0	0	-	0	0	0	0
Walckenaeria monoceros	-	-	0	0	0	0	0	0	0	0	0	0	0	0	0	-	0	0	0	0	-	0	0	0	0	0	0	0	0	0	0	0	0	0	0	1	0	-	-	-	0	0	0	0	-	0	0	0	0
Xysticus kochi	-	-	1	0	0	0	0	0	0	0	0	0	0	0	1	-	0	0	0	1	-	0	0	0	0	0	0	0	0	0	0	0	0	0	0	0	0	-	-	-	0	0	0	0	-	0	0	0	0
Xysticus lanio	-	-	0	0	0	0	0	0	0	0	0	0	0	0	0	-	0	0	0	0	-	0	0	0	0	0	0	0	0	0	0	0	0	0	0	0	0	-	-	-	0	0	0	0	-	0	0	0	0
Xysticus luctator	-	-	0	0	0	0	0	0	0	0	1	0	0	0	0	-	0	0	0	0	-	0	0	0	0	0	0	0	0	0	0	0	0	0	0	0	0	-	-	-	0	0	0	0	-	0	0	0	0
Zelotes apricorum	-	-	0	0	0	0	0	0	0	0	0	0	0	0	0	-	0	0	0	0	-	0	0	0	0	0	0	0	0	0	0	0	0	0	0	0	0	-	-	-	1	0	0	0	-	0	0	0	0
Zelotes electus	-	-	0	0	0	0	0	0	0	0	0	0	0	0	0	-	0	0	0	0	-	0	0	0	0	0	0	0	0	0	0	0	0	0	0	0	0	-	-	-	0	0	0	0	-	0	0	0	0
Zodarion germanicum	-	-	0	0	0	0	0	0	0	0	0	0	0	0	0	-	0	0	0	0	-	0	0	0	0	0	0	0	0	0	0	0	0	0	0	0	0	-	-	-	0	0	0	0	-	0	0	0	0
Zora nemoralis	-	-	0	0	0	0	0	0	0	0	0	1	0	0	0	-	1	0	0	0	-	0	0	0	0	0	0	0	0	0	0	0	0	0	0	0	0	-	-	-	1	0	0	0	-	0	0	0	0
Zora spinimana	-	-	0	0	0	0	0	0	0	0	0	0	1	0	0	-	0	0	0	0	-	0	0	0	0	0	0	0	0	0	0	0	0	0	0	0	0	-	-	-	0	0	0	0	-	0	0	0	0
[truncated: 202 more columns]

## Sheet: Woodlice
2019	1	2	3	4	5	6	7	8	9	10	11	12	13	14	15	16	17	18	19	20	21	22	23	24	25	26	27	28	29	30	31	32	33	34	35	36	37	38	39	40	41	42	43	44	45	46	47	48	49
Woodlice (Isopoda)
Number of dolines (and plateau sites)	1	1	1	1	1	2	2	2	2	2	3	3	3	3	3	4	4	4	4	4	5	5	5	5	5	6	6	6	6	6	7	7	7	7	7	8	8	8	8	8	9	9	9	9	9	10	10	10	10
Habitats: P = Plateau; D = Doline	P	P	P	P	P	P	P	P	P	P	P	P	P	P	P	P	P	P	P	P	P	P	P	P	P	P	P	P	P	P	P	P	P	P	P	P	P	P	P	P	P	P	P	P	P	P	P	P	P
Number of samples	1	2	3	4	5	1	2	3	4	5	1	2	3	4	5	1	2	3	4	5	1	2	3	4	5	1	2	3	4	5	1	2	3	4	5	1	2	3	4	5	1	2	3	4	5	1	2	3	4
Hyloniscus vividus	-	-	0	0	0	0	0	0	0	0	0	0	0	0	0	-	0	0	0	0	-	0	0	0	0	0	0	0	0	0	0	0	0	0	0	0	0	-	-	-	0	0	0	0	-	0	0	0	0
Ligidium germanicum	-	-	0	0	0	0	0	0	0	0	0	0	0	0	0	-	0	0	0	0	-	0	0	0	0	0	0	0	0	0	0	0	0	0	0	0	0	-	-	-	0	0	0	0	-	0	0	0	0
Protracheoniscus politus	-	-	17	1	6	16	3	19	15	15	22	9	20	10	10	-	23	14	2	11	-	3	5	4	3	1	14	12	17	12	11	8	8	18	7	2	0	-	-	-	2	6	5	6	-	11	39	9	15
Trachelipus rathkii	-	-	3	3	1	7	3	2	7	4	10	9	13	12	2	-	6	8	2	7	-	4	4	5	3	3	0	0	1	0	4	2	3	1	12	2	1	-	-	-	0	6	0	0	-	0	0	0	0
Trachelipus ratzeburgii	-	-	0	0	0	0	0	0	0	0	0	0	0	0	0	-	0	0	0	0	-	0	0	0	0	0	0	0	0	0	0	0	0	0	0	0	0	-	-	-	0	0	0	0	-	0	0	0	0
[truncated: 201 more columns]

## Sheet: Ants
2019	1	2	3	4	5	6	7	8	9	10	11	12	13	14	15	16	17	18	19	20	21	22	23	24	25	26	27	28	29	30	31	32	33	34	35	36	37	38	39	40	41	42	43	44	45	46	47	48	49
Ants (Hymenoptera: Formicidae)
Number of dolines (and plateau sites)	1	1	1	1	1	2	2	2	2	2	3	3	3	3	3	4	4	4	4	4	5	5	5	5	5	6	6	6	6	6	7	7	7	7	7	8	8	8	8	8	9	9	9	9	9	10	10	10	10
Habitats: P = Plateau; D = Doline	P	P	P	P	P	P	P	P	P	P	P	P	P	P	P	P	P	P	P	P	P	P	P	P	P	P	P	P	P	P	P	P	P	P	P	P	P	P	P	P	P	P	P	P	P	P	P	P	P
Number of samples	1	2	3	4	5	1	2	3	4	5	1	2	3	4	5	1	2	3	4	5	1	2	3	4	5	1	2	3	4	5	1	2	3	4	5	1	2	3	4	5	1	2	3	4	5	1	2	3	4
Aphaenogaster subterranea	-	-	0	0	0	0	0	0	0	0	0	0	0	0	0	-	0	0	0	0	-	0	0	0	0	0	0	0	0	0	0	0	0	0	0	0	0	-	-	-	0	0	0	0	-	0	0	0	0
Colobopsis truncata	-	-	0	0	0	0	0	1	0	0	0	0	0	0	0	-	0	1	0	0	-	0	0	0	0	0	0	0	0	0	0	0	0	0	0	0	0	-	-	-	0	0	0	0	-	0	0	0	0
Dolichoderus quadripunctatus	-	-	1	0	0	0	0	0	0	0	0	0	0	0	0	-	1	0	0	0	-	0	0	0	0	0	0	0	0	0	1	0	0	0	0	0	0	-	-	-	0	0	0	0	-	0	0	0	0
Formica fusca	-	-	0	0	0	0	0	0	0	0	1	5	2	0	1	-	0	0	0	1	-	0	0	0	0	0	0	0	0	0	0	0	0	0	0	0	0	-	-	-	0	0	1	0	-	0	0	0	0
Formica gagates	-	-	0	0	0	0	0	0	0	0	2	0	0	1	0	-	1	4	0	0	-	0	1	0	0	0	0	0	0	0	0	0	0	0	0	0	0	-	-	-	0	0	0	0	-	0	0	0	0
Formica polyctena	-	-	0	0	0	0	0	0	0	0	0	0	0	0	0	-	0	0	0	0	-	0	0	0	0	0	0	0	0	0	0	0	0	0	0	0	0	-	-	-	0	0	0	0	-	0	0	0	0
Lasius brunneus	-	-	0	0	0	1	0	5	0	0	0	0	0	0	0	-	1	0	0	1	-	0	0	0	0	0	0	0	0	0	0	0	0	0	0	0	0	-	-	-	0	0	2	1	-	0	0	0	0
Lasius citrinus	-	-	0	0	0	0	0	0	0	0	0	0	0	0	0	-	0	0	0	0	-	0	0	0	0	0	0	0	0	0	0	0	0	0	0	0	0	-	-	-	0	0	0	0	-	0	0	0	0
Lasius emarginatus	-	-	0	0	0	0	0	0	0	0	0	0	0	0	0	-	0	0	0	0	-	0	0	0	1	0	0	0	0	0	0	0	0	0	0	0	0	-	-	-	0	0	0	0	-	0	0	0	0
Lasius fuliginosus	-	-	0	0	0	0	0	0	0	0	0	1	0	0	0	-	0	0	0	0	-	0	0	0	0	0	0	0	0	0	0	0	0	0	0	0	0	-	-	-	0	0	0	0	-	0	0	0	0
Lasius platythorax	-	-	0	0	0	0	0	0	0	0	2	2	2	4	0	-	1	1	0	0	-	0	0	0	0	26	9	2	1	1	0	3	4	7	2	2	0	-	-	-	0	1	0	0	-	2	7	4	7
Myrmecina graminicola	-	-	11	0	6	0	0	0	0	0	6	3	2	6	2	-	5	0	5	2	-	0	0	0	0	3	0	1	1	1	3	2	2	2	0	3	1	-	-	-	0	0	1	0	-	0	0	0	0
Myrmica ruginodis	-	-	0	0	0	1	0	0	0	0	0	0	0	1	0	-	0	0	4	1	-	0	0	0	0	0	0	0	1	0	0	2	1	0	0	4	0	-	-	-	0	0	0	0	-	0	0	0	0
Myrmica sabuleti	-	-	0	0	0	0	0	0	0	0	0	3	0	0	0	-	3	2	0	6	-	0	0	0	0	0	0	0	0	0	0	0	0	0	0	0	0	-	-	-	0	0	0	0	-	0	0	0	0
Ponera coarctata	-	-	0	0	0	0	0	0	0	0	0	0	0	0	0	-	0	0	0	0	-	0	0	0	0	0	0	0	0	0	0	0	0	0	0	0	0	-	-	-	0	0	0	0	-	0	0	0	0
Stenamma debile	-	-	5	1	1	0	0	0	2	0	2	0	1	2	0	-	1	1	3	0	-	0	0	0	2	0	0	0	0	0	0	0	3	1	0	1	0	-	-	-	0	0	0	0	-	0	0	0	2
Temnothorax affinis	-	-	0	0	0	0	0	0	0	0	0	0	0	0	0	-	0	0	0	0	-	0	0	0	0	0	1	0	0	0	0	0	0	0	0	0	0	-	-	-	0	0	0	0	-	0	0	0	0
Temnothorax crassispinus	-	-	1	1	0	0	1	2	0	3	1	1	1	0	2	-	0	1	4	7	-	0	0	1	0	4	0	0	2	3	1	0	0	2	0	5	1	-	-	-	12	8	5	7	-	4	5	4	17
[truncated: 201 more columns]

## Sheet: Ground beetles 
2019	1	2	3	4	5	6	7	8	9	10	11	12	13	14	15	16	17	18	19	20	21	22	23	24	25	26	27	28	29	30	31	32	33	34	35	36	37	38	39	40	41	42	43	44	45	46	47	48	49
Ground beetles (Coleoptera: Carabidae)
Number of dolines (and plateau sites)	1	1	1	1	1	2	2	2	2	2	3	3	3	3	3	4	4	4	4	4	5	5	5	5	5	6	6	6	6	6	7	7	7	7	7	8	8	8	8	8	9	9	9	9	9	10	10	10	10
Habitats: P = Plateau; D = Doline	P	P	P	P	P	P	P	P	P	P	P	P	P	P	P	P	P	P	P	P	P	P	P	P	P	P	P	P	P	P	P	P	P	P	P	P	P	P	P	P	P	P	P	P	P	P	P	P	P
Number of samples	1	2	3	4	5	1	2	3	4	5	1	2	3	4	5	1	2	3	4	5	1	2	3	4	5	1	2	3	4	5	1	2	3	4	5	1	2	3	4	5	1	2	3	4	5	1	2	3	4
Abax carinatus	-	-	0	0	0	0	0	0	1	0	0	1	0	0	0	-	1	0	0	0	-	1	0	0	0	0	0	0	0	0	0	1	0	1	0	2	1	-	-	-	1	0	0	0	-	0	0	0	0
Abax ovalis	-	-	0	0	0	0	0	0	0	0	0	0	0	0	0	-	0	0	0	0	-	0	0	0	0	0	0	0	0	0	0	0	0	0	0	0	0	-	-	-	0	0	0	0	-	0	0	0	0
Abax parallelepipedus	-	-	2	0	0	0	0	5	4	2	3	0	1	1	0	-	3	2	0	0	-	1	1	2	1	0	2	5	0	1	2	0	4	1	1	1	1	-	-	-	1	0	3	1	-	0	0	1	1
Abax parallelus	-	-	0	0	1	0	0	0	0	2	1	1	1	1	1	-	6	0	0	0	-	2	2	0	2	2	0	0	1	1	1	1	1	1	1	1	1	-	-	-	0	2	4	6	-	0	3	0	0
Agonim viduum	-	-	0	0	0	0	0	0	0	0	0	0	0	0	0	-	0	0	0	0	-	0	0	0	0	0	0	0	0	0	0	0	0	0	0	0	0	-	-	-	0	0	0	0	-	0	0	0	0
Agonum hypocrita	-	-	0	0	0	0	0	0	0	0	0	0	0	0	0	-	0	0	0	0	-	0	0	0	0	0	0	0	0	0	0	0	0	0	0	0	0	-	-	-	0	0	0	0	-	0	0	0	0
Amara aulica	-	-	0	0	0	0	0	0	0	0	0	0	0	0	0	-	0	0	0	0	-	0	0	0	0	0	0	0	0	0	0	0	0	0	0	0	0	-	-	-	0	0	0	0	-	0	0	0	0
Amara similata	-	-	0	0	0	0	0	0	0	0	0	0	0	0	0	-	0	0	0	0	-	0	0	0	0	0	0	0	0	0	0	0	0	0	0	0	0	-	-	-	0	0	0	0	-	0	0	0	0
Carabus cancellatus	-	-	0	0	0	0	0	0	0	0	4	0	2	0	0	-	1	3	0	0	-	0	2	0	0	0	0	0	0	0	0	0	0	0	0	0	0	-	-	-	0	0	0	0	-	0	0	0	0
Carabus coriaceus	-	-	0	0	0	0	0	0	0	0	0	0	0	0	0	-	0	0	0	0	-	0	0	0	0	0	0	0	0	0	0	0	0	0	0	0	0	-	-	-	0	0	0	0	-	0	0	0	0
Carabus hortensis	-	-	0	0	0	0	0	0	0	0	0	0	0	0	0	-	0	0	0	0	-	0	0	0	0	0	0	0	0	0	0	0	0	0	0	0	0	-	-	-	0	0	0	0	-	0	0	0	0
Carabus nemoralis	-	-	1	0	0	0	0	1	2	3	1	3	2	1	0	-	4	1	0	1	-	2	0	0	0	0	0	0	1	0	0	0	1	1	0	2	3	-	-	-	0	4	1	1	-	0	3	0	0
Carabus scheidleri	-	-	1	0	1	1	0	2	0	1	1	1	0	0	0	-	3	0	0	0	-	0	2	0	0	0	0	0	1	0	2	0	1	2	2	0	7	-	-	-	0	2	0	0	-	0	0	0	0
Carabus ullrichii	-	-	2	0	3	1	0	0	1	0	0	1	0	0	0	-	1	0	0	1	-	0	0	0	0	0	0	0	0	0	0	1	1	2	0	0	0	-	-	-	0	2	0	0	-	0	1	0	0
Cychrus caraboides	-	-	1	0	0	0	0	0	0	0	0	0	0	0	0	-	0	0	0	0	-	0	0	0	0	0	0	0	0	0	0	0	0	0	0	0	0	-	-	-	0	0	0	0	-	0	0	0	0
Harpalus atratus	-	-	0	0	0	0	0	0	0	0	0	0	0	0	0	-	0	0	0	0	-	0	0	0	0	0	0	0	0	0	0	0	0	0	0	0	0	-	-	-	0	0	0	0	-	0	0	0	0
Harpalus latus	-	-	0	0	0	0	0	0	0	0	0	1	1	1	0	-	0	0	0	0	-	0	0	0	0	1	0	0	0	0	0	0	0	0	0	0	0	-	-	-	1	1	0	0	-	0	0	0	0
Harpalus tardus	-	-	0	0	0	0	0	0	0	0	0	0	0	0	0	-	0	1	0	0	-	0	0	0	0	0	0	0	0	0	0	0	0	0	0	0	0	-	-	-	0	0	0	0	-	0	0	0	0
Leistus rufomarginatus	-	-	0	0	0	0	0	0	0	0	0	0	0	0	0	-	0	0	0	0	-	0	0	0	0	0	0	0	0	0	0	0	0	0	0	0	0	-	-	-	0	0	0	0	-	0	0	0	0
Limodromus assimilis	-	-	0	0	0	0	0	0	0	0	0	0	0	0	0	-	0	0	0	0	-	0	0	0	0	0	0	0	0	0	0	0	0	0	0	0	0	-	-	-	0	0	0	0	-	0	0	0	0
Loricera pilicornis	-	-	0	0	0	0	0	0	0	0	0	0	0	0	0	-	0	0	0	0	-	0	0	0	0	0	0	0	0	0	0	0	0	0	0	0	0	-	-	-	0	0	0	0	-	0	0	0	0
Metallina lampros	-	-	0	0	0	0	0	0	0	0	0	0	0	0	0	-	1	0	0	0	-	0	0	0	0	0	0	0	0	0	0	0	0	0	0	0	0	-	-	-	0	0	1	0	-	0	0	0	0
Notiophilus palustris	-	-	0	0	0	0	0	0	0	0	0	0	0	0	1	-	0	0	0	0	-	0	0	0	0	0	0	0	0	0	0	0	0	0	0	0	0	-	-	-	0	0	0	0	-	0	0	0	0
Notiophilus rufipes	-	-	0	0	0	1	0	0	0	0	0	0	0	0	0	-	0	0	0	0	-	0	0	0	0	0	0	0	0	0	0	0	0	0	0	0	0	-	-	-	0	0	0	0	-	0	0	0	0
Ocydromus dalmatinus	-	-	0	0	0	0	0	0	0	0	0	0	0	0	0	-	0	0	0	0	-	0	0	0	0	0	0	0	0	0	0	0	0	0	0	0	0	-	-	-	0	0	0	0	-	0	0	0	0
Ocydromus latinus	-	-	0	0	0	0	0	0	0	0	0	0	0	0	0	-	0	0	0	0	-	0	0	0	0	0	0	0	0	0	0	0	0	0	0	0	0	-	-	-	0	0	0	0	-	0	0	0	0
Platyderus rufus	-	-	0	0	0	0	0	0	0	0	0	0	0	0	0	-	1	0	0	0	-	0	0	0	0	0	0	0	0	0	0	0	0	0	0	0	0	-	-	-	0	0	0	0	-	0	0	0	0
Pterostichus melas	-	-	0	0	0	0	0	0	0	0	2	1	0	0	0	-	0	0	0	0	-	0	0	0	0	0	0	0	0	0	0	0	0	0	0	0	0	-	-	-	0	0	0	0	-	0	0	0	0
Pterostichus ovoideus	-	-	0	0	0	0	0	0	0	0	0	0	0	0	0	-	0	0	0	0	-	0	0	0	0	0	0	0	0	0	0	0	0	0	0	0	0	-	-	-	0	0	0	0	-	0	0	0	0
Stomis pumicatus	-	-	0	0	0	0	0	0	0	0	0	0	0	0	0	-	0	0	0	0	-	0	0	0	0	0	0	0	0	0	0	0	0	0	0	0	0	-	-	-	0	0	0	0	-	0	0	0	1
Trechus pilisensis	-	-	0	0	0	0	0	0	0	0	0	0	0	0	0	-	0	2	0	0	-	0	0	0	1	0	0	0	0	0	0	0	0	0	0	0	0	-	-	-	0	0	1	0	-	0	0	0	0
Trechus quadristriatus	-	-	0	0	0	0	0	0	0	0	0	0	0	0	0	-	0	0	0	0	-	0	0	0	0	0	0	0	0	0	0	0	0	0	0	0	0	-	-	-	0	0	0	0	-	0	0	0	0
[truncated: 202 more columns]

## Sheet: Rove beetles 
2019	1	2	3	4	5	6	7	8	9	10	11	12	13	14	15	16	17	18	19	20	21	22	23	24	25	26	27	28	29	30	31	32	33	34	35	36	37	38	39	40	41	42	43	44	45	46	47	48	49
Rove beetles (Coleoptera: Staphylinidae)
Number of dolines (and plateau sites)	1	1	1	1	1	2	2	2	2	2	3	3	3	3	3	4	4	4	4	4	5	5	5	5	5	6	6	6	6	6	7	7	7	7	7	8	8	8	8	8	9	9	9	9	9	10	10	10	10
Habitats: P = Plateau; D = Doline	P	P	P	P	P	P	P	P	P	P	P	P	P	P	P	P	P	P	P	P	P	P	P	P	P	P	P	P	P	P	P	P	P	P	P	P	P	P	P	P	P	P	P	P	P	P	P	P	P
Number of samples	1	2	3	4	5	1	2	3	4	5	1	2	3	4	5	1	2	3	4	5	1	2	3	4	5	1	2	3	4	5	1	2	3	4	5	1	2	3	4	5	1	2	3	4	5	1	2	3	4
Abemus chloropterus	-	-	0	0	0	0	0	0	0	1	0	0	0	0	1	-	0	0	0	0	-	0	0	0	0	0	0	0	0	0	0	0	0	0	1	0	0	-	-	-	0	0	0	0	-	0	0	0	0
Aleochara sp.	-	-	0	0	0	0	0	0	0	0	0	0	0	0	0	-	0	0	0	0	-	0	0	0	0	0	0	0	0	0	0	0	0	0	0	0	0	-	-	-	0	0	0	0	-	0	0	0	0
Anotylus insecatus	-	-	0	0	0	0	0	0	0	0	0	0	0	0	0	-	0	0	0	0	-	0	0	0	0	0	0	0	0	0	0	0	0	0	0	0	0	-	-	-	0	0	0	0	-	0	0	0	0
Anotylus inustus	-	-	0	0	0	0	0	0	0	0	1	0	0	0	0	-	0	0	0	0	-	0	0	0	0	0	2	0	0	0	1	0	0	0	0	0	0	-	-	-	0	0	0	0	-	0	0	1	0
Anotylus mutator	-	-	0	0	0	0	0	0	0	0	0	0	0	0	0	-	0	0	0	0	-	0	0	0	0	0	0	0	0	0	0	0	0	0	0	0	0	-	-	-	0	0	0	0	-	0	0	0	0
Anotylus rugosus	-	-	0	0	0	0	0	0	0	0	0	0	0	0	0	-	0	0	0	0	-	0	0	0	0	0	0	0	0	0	0	0	0	0	0	0	0	-	-	-	0	0	0	0	-	0	0	0	0
Anotylus sculpturatus	-	-	0	0	0	0	0	0	0	0	0	0	0	0	0	-	0	0	0	0	-	0	0	0	0	0	0	0	0	0	0	0	0	0	0	0	0	-	-	-	0	0	0	0	-	0	0	0	0
Anotylus tetracarinatus	-	-	0	0	0	0	0	0	0	0	0	0	0	0	0	-	0	0	0	0	-	0	0	0	0	0	0	0	0	0	0	0	0	0	0	0	0	-	-	-	0	0	0	0	-	0	0	0	0
Atheta gagatina	-	-	0	0	0	0	0	0	0	0	0	0	0	0	0	-	0	0	0	0	-	0	0	0	0	0	0	0	0	0	0	0	0	0	0	0	0	-	-	-	0	0	0	0	-	0	0	0	0
Atheta pervagata	-	-	0	0	0	1	0	0	0	0	0	0	0	0	1	-	4	0	1	1	-	0	0	0	0	0	2	0	0	1	0	1	0	1	0	0	0	-	-	-	0	0	0	2	-	0	0	1	0
Atheta ravilla	-	-	0	0	0	0	0	0	0	0	0	0	0	0	0	-	0	0	0	0	-	0	0	0	0	0	0	0	0	0	0	0	0	0	0	0	0	-	-	-	0	0	0	0	-	0	0	0	0
Atheta sp.	-	-	0	0	0	0	0	0	0	0	0	0	0	0	0	-	0	0	0	0	-	0	0	0	0	0	0	0	0	0	0	0	0	0	0	0	0	-	-	-	0	0	0	0	-	0	0	0	0
Atheta voeslauensis	-	-	0	0	0	0	0	0	0	0	0	0	0	0	0	-	0	0	0	0	-	0	0	0	0	0	0	0	0	0	0	0	0	0	0	0	0	-	-	-	0	0	0	0	-	0	0	0	0
Autalia impressa	-	-	0	0	0	0	0	0	0	0	0	0	0	0	0	-	0	0	0	0	-	0	0	0	0	0	0	0	0	0	0	0	0	0	0	0	0	-	-	-	0	0	0	0	-	0	0	0	0
Carpelimus corticinus	-	-	0	0	0	0	0	0	0	0	0	0	0	0	0	-	0	0	0	0	-	0	0	0	0	0	0	0	0	0	0	0	0	0	0	0	0	-	-	-	0	0	0	0	-	0	0	0	0
Carpelimus rivularis	-	-	0	0	0	0	0	0	0	0	0	0	0	0	0	-	0	0	0	0	-	0	0	0	0	0	0	0	0	0	0	0	0	0	0	0	0	-	-	-	0	0	0	0	-	0	0	0	0
Dinaraea linearis	-	-	0	0	0	0	0	0	0	0	0	0	0	0	0	-	0	0	0	0	-	0	0	0	0	0	0	0	0	0	0	0	0	0	0	0	0	-	-	-	0	0	0	0	-	0	0	0	0
Gabrius femoralis	-	-	0	0	0	0	1	0	0	1	0	0	0	0	0	-	0	0	0	0	-	0	0	0	0	0	0	0	0	0	0	0	0	0	0	0	0	-	-	-	0	0	0	0	-	0	0	0	0
Gabrius splendidulus	-	-	0	0	0	0	0	0	0	0	0	0	0	0	0	-	0	0	0	0	-	1	0	0	0	0	0	0	0	0	0	0	0	0	0	0	0	-	-	-	0	0	0	0	-	0	0	0	0
Geostiba circellaris	-	-	0	0	0	0	0	0	0	0	0	0	0	0	0	-	0	0	0	0	-	0	0	0	0	0	0	0	0	0	0	0	0	0	0	0	0	-	-	-	0	0	0	0	-	0	0	0	0
Habrocerus capillaricornis	-	-	0	0	0	0	0	0	0	0	0	0	0	0	0	-	0	0	0	0	-	0	0	0	0	0	0	0	0	0	0	0	0	0	0	0	0	-	-	-	0	0	0	0	-	0	0	0	0
Homoeusa acuminata	-	-	0	0	0	0	0	0	0	0	0	0	0	0	0	-	0	0	0	0	-	0	0	0	0	0	0	0	0	0	0	0	0	0	0	0	0	-	-	-	0	0	0	0	-	0	0	0	0
Lathrobium castaneipenne	-	-	0	0	0	0	0	0	0	0	0	0	0	0	0	-	0	0	0	0	-	0	0	0	0	0	0	0	0	0	0	0	0	0	0	0	0	-	-	-	0	0	0	0	-	0	0	0	0
Liogluta longiuscula	-	-	0	0	0	0	0	0	0	0	0	0	0	0	0	-	0	0	0	0	-	0	0	0	0	0	0	0	0	0	0	0	0	0	0	0	0	-	-	-	0	0	0	0	-	0	1	0	0
Mocyta fungi	-	-	0	0	0	0	0	0	0	0	0	0	0	0	0	-	0	0	0	0	-	0	0	0	0	0	0	0	0	0	0	0	0	0	0	0	0	-	-	-	0	0	0	0	-	0	0	0	0
Mocyta orbata	-	-	0	0	0	0	0	0	0	0	0	0	0	0	0	-	0	0	0	0	-	0	0	0	0	0	0	0	0	0	0	0	0	0	0	0	0	-	-	-	0	0	0	0	-	0	1	0	0
Mycetoporus punctipennis	-	-	0	0	0	0	0	0	0	0	0	0	0	0	0	-	0	0	0	0	-	0	0	0	0	0	0	0	0	0	0	0	0	0	0	0	0	-	-	-	0	0	0	0	-	0	0	0	0
Ocypus biharicus	-	-	1	0	0	0	0	0	0	0	0	0	1	0	0	-	0	0	0	0	-	0	0	0	0	0	0	0	0	0	0	0	0	0	0	0	0	-	-	-	1	0	0	0	-	0	0	0	0
Ocypus brunnipes	-	-	0	0	0	0	0	0	0	0	0	0	0	0	0	-	0	0	0	1	-	0	0	0	0	0	0	0	0	0	0	0	0	0	0	0	0	-	-	-	0	0	0	0	-	0	0	0	0
Ocypus nitens	-	-	0	0	0	0	0	0	0	0	0	0	1	0	0	-	0	0	0	0	-	0	0	0	0	0	0	0	0	0	0	0	0	0	0	0	0	-	-	-	0	0	0	0	-	0	0	0	0
Omalium caesum	-	-	0	0	0	0	0	0	0	0	0	0	0	0	0	-	0	0	0	0	-	0	0	0	0	0	0	0	0	0	0	0	0	0	0	0	0	-	-	-	0	0	0	0	-	0	0	0	0
Othius punctulatus	-	-	0	0	0	0	0	0	0	0	0	0	0	0	0	-	0	0	0	0	-	0	0	0	0	0	0	0	0	0	0	0	0	0	0	0	0	-	-	-	0	0	0	0	-	0	0	0	0
Oxypoda abdominalis	-	-	0	0	0	0	0	0	0	0	0	0	0	0	0	-	0	0	0	0	-	0	0	0	0	0	0	0	0	0	0	0	0	0	0	0	0	-	-	-	0	0	0	0	-	0	0	0	0
Oxypoda brevicornis	-	-	0	0	0	0	0	0	0	0	0	0	0	0	0	-	0	0	0	0	-	0	0	0	0	0	0	0	0	0	0	0	0	0	0	0	0	-	-	-	0	0	0	0	-	0	0	0	0
Parabolitobius formosus	-	-	0	1	0	0	0	0	0	0	0	0	0	0	0	-	0	0	0	0	-	0	0	0	0	0	0	0	0	0	0	0	0	0	0	0	0	-	-	-	0	0	0	0	-	0	0	0	0
Pella cognatus	-	-	0	0	0	0	0	0	0	0	0	0	0	0	0	-	0	0	0	0	-	0	0	0	0	0	0	0	0	0	0	0	0	0	0	0	0	-	-	-	0	0	0	0	-	0	0	0	0
Pella humeralis	-	-	0	0	0	0	0	0	0	0	0	0	0	0	0	-	0	0	0	0	-	0	0	0	0	0	0	0	0	0	0	0	0	0	0	0	0	-	-	-	0	0	0	0	-	0	0	0	0
Philonthus cognatus	-	-	0	0	0	0	0	0	0	0	0	0	0	0	0	-	0	0	0	0	-	0	0	0	0	0	0	0	0	0	0	0	0	0	0	0	0	-	-	-	0	0	0	0	-	0	0	0	0
Philonthus decorus	-	-	0	0	0	0	0	0	0	0	0	0	0	0	0	-	0	0	0	0	-	0	0	0	0	0	0	0	0	0	0	0	0	0	0	0	0	-	-	-	0	0	0	0	-	0	0	0	0
Philonthus tenuicornis	-	-	0	0	0	0	0	0	0	0	0	0	0	0	0	-	0	0	0	0	-	0	0	0	0	0	0	0	0	0	0	0	0	0	0	0	0	-	-	-	0	0	0	0	-	0	0	0	0
Platydracus chalcocephalus	-	-	0	0	1	0	0	0	0	0	0	1	0	0	2	-	0	0	0	0	-	0	0	0	0	0	0	0	0	0	0	0	0	0	0	0	0	-	-	-	0	1	0	0	-	0	0	0	0
Platydracus fulvipes	-	-	0	0	0	0	0	0	0	0	0	0	0	0	0	-	0	2	1	0	-	0	0	0	0	0	0	0	0	0	0	0	0	0	0	0	0	-	-	-	0	0	0	0	-	0	0	0	0
Quedius curtipennis	-	-	0	0	0	1	0	0	0	0	0	0	0	0	0	-	0	0	0	0	-	0	0	0	0	0	0	0	0	0	0	0	0	0	0	0	0	-	-	-	0	0	0	0	-	0	0	0	0
Quedius fumatus	-	-	0	0	0	0	0	0	0	0	0	0	0	0	0	-	0	0	1	0	-	0	0	0	0	0	0	0	0	0	0	0	0	0	0	0	0	-	-	-	0	0	0	0	-	0	0	0	0
Quedius lateralis	-	-	0	0	0	0	0	0	0	0	0	0	0	0	0	-	0	0	0	0	-	0	0	0	0	0	0	0	0	0	0	0	0	0	0	0	0	-	-	-	0	0	0	0	-	0	0	0	0
Quedius sp.	-	-	0	0	0	0	0	0	0	0	0	0	0	0	0	-	0	0	0	0	-	0	0	0	0	0	0	0	0	0	0	0	0	0	0	0	0	-	-	-	0	0	0	0	-	0	0	0	0
Quedius umbrinus	-	-	0	0	0	0	0	0	0	0	0	0	0	0	0	-	0	0	0	0	-	0	0	0	0	0	0	0	0	0	0	0	0	0	0	0	0	-	-	-	0	0	0	0	-	0	0	0	0
Rugilus rufipes	-	-	0	0	0	0	0	0	0	0	0	0	0	0	0	-	0	0	0	0	-	0	0	0	0	0	0	0	0	0	0	0	0	0	0	0	0	-	-	-	0	0	0	0	-	0	0	0	0
Tachyporus hypnorum	-	-	0	0	0	0	0	0	0	0	0	0	0	0	0	-	0	0	0	0	-	0	0	0	0	0	0	0	0	0	0	0	0	0	0	0	0	-	-	-	0	0	0	0	-	0	0	0	0
[truncated: 202 more columns]
